# Supplementary material for: Enantioseparation of amino alcohol drugs by nonaqueous capillary electrophoresis with a maltobionic acid-based ionic liquid as the chiral selector
Source: Royal Society of Chemistry journal article supplement (doi:10.1039/c9an01162e), 2019-01-01
Supplement: c9an01162e1.pdf [file c9an01162e1.pdf]

## Supplementary Material for

### Enantioseparation of amino alcohol drugs by nonaqueous capillary electrophoresis with an maltobionic acid-based ionic liquid as the chiral selector

Xiaofei Ma<sup>1,2</sup>, Zigui Kan<sup>1,2</sup>, Yingxiang Du<sup>1,2,\*</sup>, Jiangxia Yang<sup>1,2</sup>, Zijie Feng<sup>1,2</sup>,

Xinqi Zhu<sup>1,2</sup>, Cheng Chen<sup>1,2</sup>

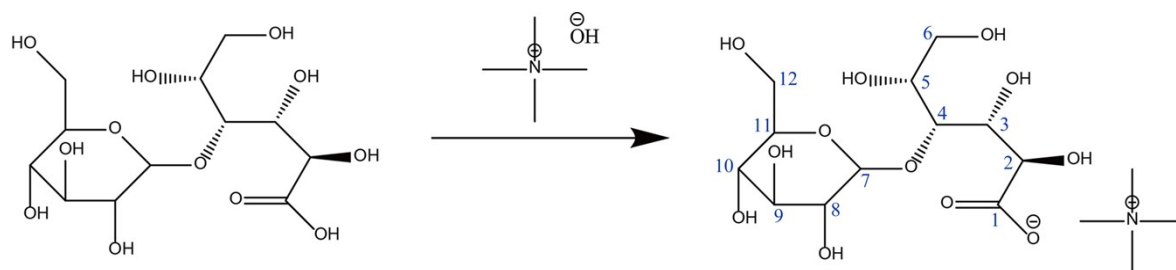

**Fig.S1** Synthesis route for TMA-MA.

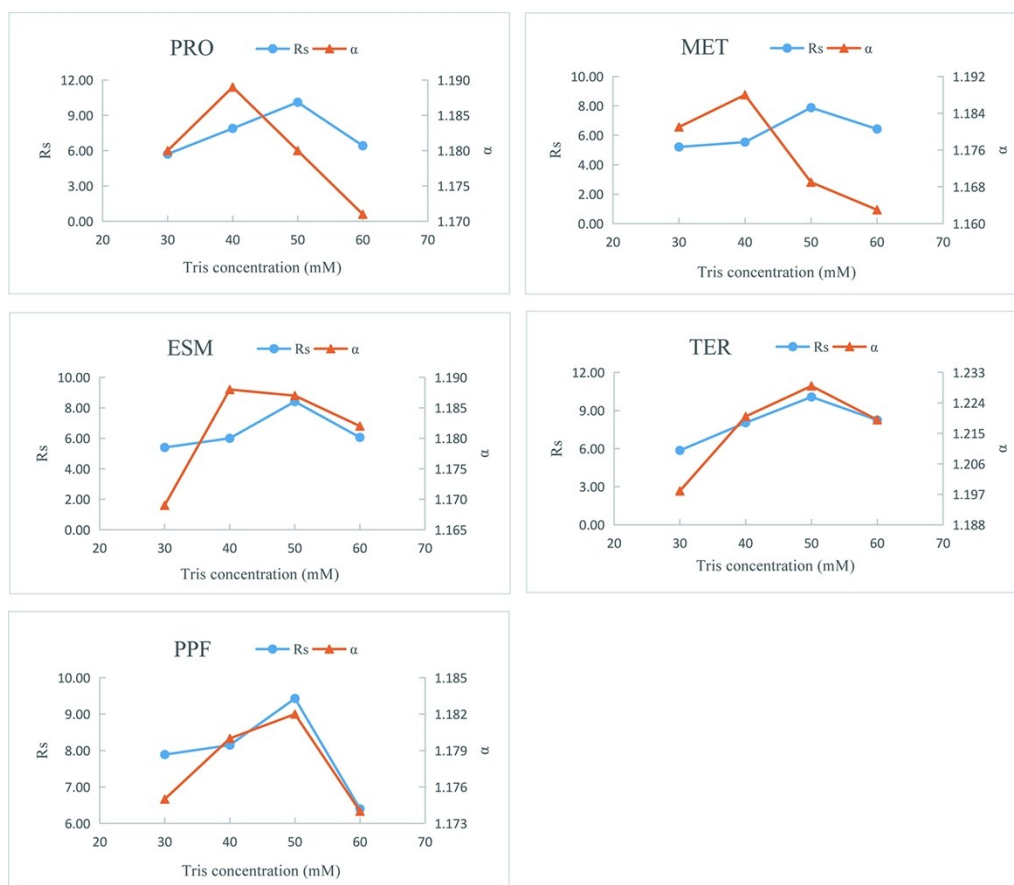

**Fig.S2** Effect of Tris concentration on enantioseparation. Conditions: capillary temperature, 20°C; applied voltage, 20 kV; BGE, a methanol solution containing 40 mM boric acid, 30-60 mM Tris and 150 mM TMA-MA.

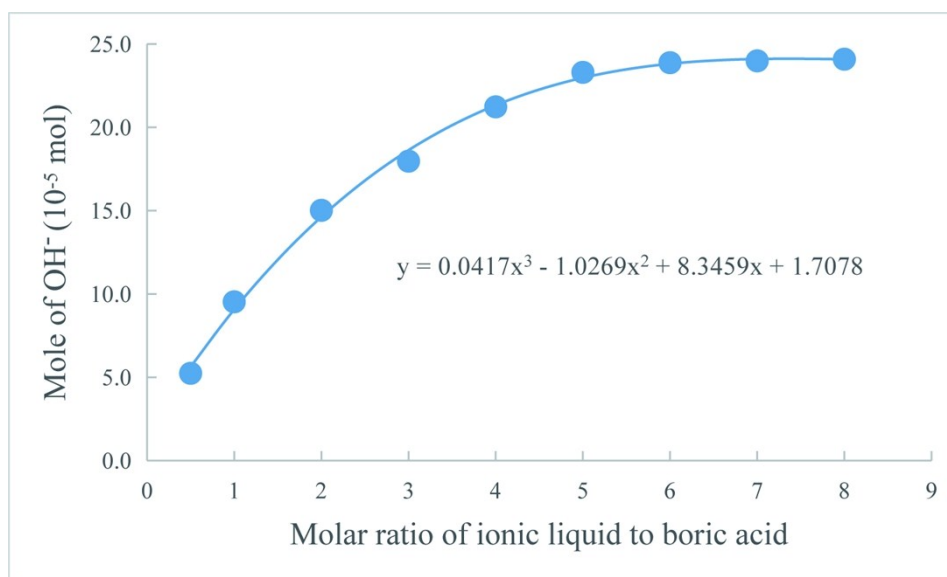

**Fig.S3** Mole of OH<sup>-</sup> consumed by H<sup>+</sup> at different ratio of ionic liquid to boric acid.

**Table S1** Merits of comparable works for enantioseparation of amino alcohols drugs in CE

| Chiral selector                  | Price     | Demand | Central ion | Enantioselectivity | Literature |
|----------------------------------|-----------|--------|-------------|--------------------|------------|
| Tetramethylammonium-lactobionate | Moderate  | Great  | Borax       | Ordinary           | 31         |
| β-cyclodextrin                   | Moderate  | Small  | copper (II) | Strong             | 33         |
| Vancomycin                       | Expensive | Small  | /           | Ordinary           | 34         |
| Cilindamycin phosphate           | Expensive | Great  | /           | Ordinary           | 35         |
| Di-n-amyl-L-tartrate             | Cheap     | Great  | Boric acid  | Ordinary           | 36         |
| TMA-MA                           | Moderate  | Great  | Boric acid  | Powerful           |            |
